# Supplementary material
Source: PubMed Central journal article supplement (PMC10251240)
Supplement: jamaoncol-e231638-s001.pdf [file jamaoncol-e231638-s001.pdf]

## Supplemental Online Content

Pithadia KJ, Advani PG, Citrin DE, et al. Comparing risk for second primary cancers after intensity-modulated vs 3-dimensional conformal radiation therapy for prostate cancer, 2002-2015. *JAMA Oncol*. Published online June 8, 2023.  
doi:10.1001/jamaoncol.2023.1638

**eFigure 1.** Selection of analytic cohorts

**eTable 1.** Hazard ratios for selected second solid cancer types, by receipt of brachytherapy in the first year following prostate cancer diagnosis and by calendar year of prostate cancer diagnosis

This supplemental material has been provided by the authors to give readers additional information about their work.

**eFigure1.** Selection of analytic cohorts.

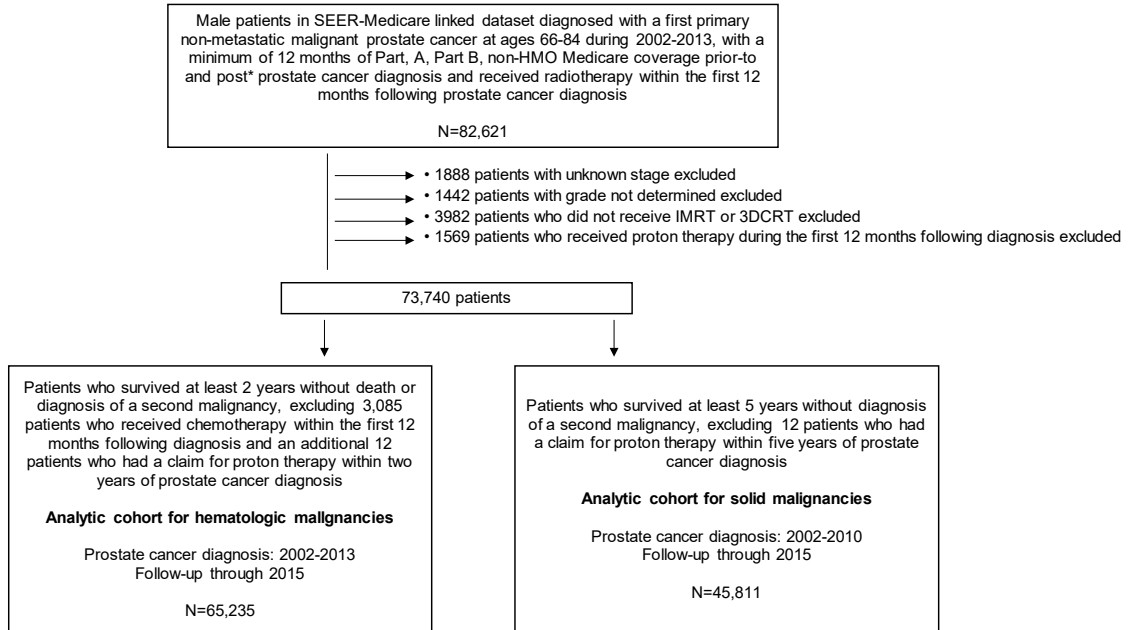

\*Or coverage until death for people who survived < 12 months.

**eTable1.** Hazard ratios for selected second solid cancer types, by receipt of brachytherapy in the first year following prostate cancer diagnosis and by calendar year of prostate cancer diagnosis<sup>a</sup>

|                       | Receipt of brachytherapy     |                              | Year of prostate cancer diagnosis |                              |
|-----------------------|------------------------------|------------------------------|-----------------------------------|------------------------------|
|                       | No                           | Yes                          | 2002-2005                         | 2006-2010                    |
|                       | IMRT vs 3DCRT<br>HR (95% CI) | IMRT vs 3DCRT<br>HR (95% CI) | IMRT vs 3DCRT<br>HR (95% CI)      | IMRT vs 3DCRT<br>HR (95% CI) |
| Second cancer site    |                              |                              |                                   |                              |
| All solid cancers     | 0.88 (0.79-0.99)             | 0.95 (0.83-1.08)             | 0.85 (0.76-0.94)                  | 1.14 (0.96-1.36)             |
| Likely in-field sites | 0.88 (0.72-1.08)             | 0.89 (0.71-1.13)             | 0.83 (0.69-1.00)                  | 1.01 (0.74-1.37)             |
| Bladder               | 0.96 (0.74-1.26)             | 0.80 (0.59-1.09)             | 0.88 (0.70-1.12)                  | 0.89 (0.60-1.32)             |
| Colon                 | 0.70 (0.50-1.00)             | 0.83 (0.51-1.35)             | 0.66 (0.46-0.94)                  | 1.06 (0.59-1.88)             |
| Anorectum             | 1.10 (0.58-2.09)             | 1.43 (0.84-2.46)             | 1.02 (0.61-1.73)                  | 1.53 (0.65-3.58)             |

Abbreviations: 3DCRT – 3D conformal radiation therapy; HR - Hazard Ratio; IMRT - intensity modulated radiation therapy; 95% CI - 95% Confidence Interval

a. Models were adjusted for time fixed variables of age at diagnosis, race, grade at prostate diagnosis, Charlson comorbidity index, and prostatectomy using the categories presented in Table 1 and time-dependent covariates of chemotherapy, brachytherapy (calendar year analyses only) and hormone therapy.
